# Supplementary material for: Purchase, consumption, and ownership of chickens and chicken products among households in Maputo, Mozambique: A cross-sectional study
Source: PubMed Central journal article supplement — medRxiv. 2024 May 14:2024.05.14.24307337. Preprint. [Version 1] doi: 10.1101/2024.05.14.24307337 (PMC11118661; doi:10.1101/2024.05.14.24307337), 2024-05-14
Supplement: NIHPP2024.05.14.24307337V1-supplement-1.pdf [file NIHPP2024.05.14.24307337V1-supplement-1.pdf]

## SUPPLEMENTARY TABLES

**Supplementary Table 1.** Multi-stage cluster sampling strategy in Maputo, Mozambique.

| District                      | Population     | Percentage of the total population of Maputo | Number of clusters of 20 households | Number of neighborhoods | Name of sampled neighborhoods                         |
|-------------------------------|----------------|----------------------------------------------|-------------------------------------|-------------------------|-------------------------------------------------------|
| KaMavota                      | 293,766        | 29%                                          | 8                                   | 4                       | 3 de Fevereiro<br>Costa do Sol<br>Mahotas<br>Hulene B |
| KaMaxakeni                    | 223,936        | 22%                                          | 6                                   | 3                       | Urbanização<br>Maxaquene A<br>Maxaquene C             |
| KaMubukwana                   | 304,524        | 31%                                          | 8                                   | 4                       | Malhazine<br>Zimpeto<br>Bagamoyo<br>Inhagoia B        |
| KaTembe                       | 20,629         | 2%                                           | 1                                   | 1                       | Chali                                                 |
| Nlhamankulu                   | 155,462        | 16%                                          | 4                                   | 2                       | Chamanculo D<br>Aeroporto A                           |
| <b>Total (City of Maputo)</b> | <b>998,317</b> | <b>100%</b>                                  | <b>27</b>                           | <b>14</b>               |                                                       |

**Supplementary Table 2.** Source of live chickens, chicken meat, eggs, and chicken litter compost among households that purchased these products in the past week of the survey date in Maputo, Mozambique in May-June 2021 (unweighted statistics).

| Source                                    | Broiler chicken meat | Live broiler chickens | Live indigenous chicken | Eggs        | Chicken litter compost |
|-------------------------------------------|----------------------|-----------------------|-------------------------|-------------|------------------------|
|                                           | (N=250)              | (N=49)                | (N= 6)                  | (N=263)     | (N=58)                 |
| Markets                                   | 43 (17.2%)           | 9 (18.4%)             | 1 (16.7%)               | 43 (16.3%)  | 1 (1.7%)               |
| Supermarkets                              | 7 (2.8%)             | 0 (0%)                | 0 (0%)                  | 10 (3.8%)   | 0 (%)                  |
| Corner stores                             | 141 (56.4%)          | 0 (0%)                | 2 (33.3%)               | 162 (61.6%) | 0 (%)                  |
| Family/friends/neighbors                  | 4 (1.6%)             | 5 (10.2%)             | 3 (50%)                 | 13 (5.0%)   | 13 (22.4%)             |
| Directly from farmers                     | 45 (18.0%)           | 32 (65.3%)            | 0 (0%)                  | 22 (8.4%)   | 23 (39.7%)             |
| Directly from layers that I own           | 1 (0.4%)             | 1 (2.0%)              | 0 (0%)                  | 6 (2.3%)    | 2 (3.4%)               |
| Directly from broiler chickens that I own | 8 (3.2%)             | 2 (4.1%)              | 0 (0%)                  | 1 (0.4%)    | 14 (24.1%)             |

**Supplementary Table 3.** Source of live chickens, chicken meat, eggs, and chicken litter compost among households that purchased these products in the past week of the survey date in Maputo, Mozambique in May-June 2021 (weighted statistics<sup>1</sup> with percentages for total households (N=175,143)).

| Source                                    | Broiler chicken meat<br>(N=78,436) | Live broiler chickens<br>(N=14,986) | Live indigenous<br>chicken<br>(N=1,950) | Eggs<br>(N=81,432) | Chicken litter<br>compost<br>(N=17,891) |
|-------------------------------------------|------------------------------------|-------------------------------------|-----------------------------------------|--------------------|-----------------------------------------|
| Markets                                   | 13,820 (7.9%)                      | 2,903 (1.7%)                        | 316 (0.2%)                              | 13,054 (7.5%)      | 327 (0.2%)                              |
| Supermarkets                              | 2,289 (1.3%)                       | 0 (0%)                              | 0 (0%)                                  | 3,221 (1.8%)       | 0 (0%)                                  |
| Corner stores                             | 44,734 (25.5%)                     | 0 (0%)                              | 636 (0.4%)                              | 50,119 (28.6%)     | 0 (0%)                                  |
| Family/friends/neighbors                  | 1,301 (0.7%)                       | 1,613 (0.9%)                        | 998 (0.6%)                              | 4,010 (2.3%)       | 4,223 (2.4%)                            |
| Directly from farmers                     | 13,267 (7.6%)                      | 9,506 (5.4%)                        | 0 (0%)                                  | 6,869 (3.9%)       | 6,903 (3.9%)                            |
| Directly from layers that I own           | 316 (0.2%)                         | 316 (0.2%)                          | 0 (0%)                                  | 1,941 (1.1%)       | 640 (0.4%)                              |
| Directly from broiler chickens that I own | 2,619 (1.5%)                       | 648 (0.4%)                          | 0 (0%)                                  | 316 (0.2%)         | 4,232 (2.4%)                            |

**Supplementary Table 4.** Source of live chickens, chicken meat, eggs, and chicken litter compost among households that purchased these products in the past week of the survey date in Maputo, Mozambique in May-June 2021 (unweighted statistics with percentages for total households (N=570)).

| Source                                    | Broiler chicken meat<br>(N=250) | Live broiler chickens<br>(N=49) | Live indigenous<br>chicken<br>(N= 6) | Eggs<br>(N=263) | Chicken litter<br>compost<br>(N=58) |
|-------------------------------------------|---------------------------------|---------------------------------|--------------------------------------|-----------------|-------------------------------------|
| Markets                                   | 43 (7.5%)                       | 9 (1.6%)                        | 1 (0.2%)                             | 43 (7.5%)       | 1 (0.2%)                            |
| Supermarkets                              | 7 (1.2%)                        | 0 (0%)                          | 0 (0%)                               | 10 (1.8%)       | 0 (%)                               |
| Corner stores                             | 141 (24.7%)                     | 0 (0%)                          | 2 (0.4%)                             | 162 (28.4%)     | 0 (%)                               |
| Family/friends/neighbors                  | 4 (0.7%)                        | 5 (0.9%)                        | 3 (0.5%)                             | 13 (2.3%)       | 13 (2.3%)                           |
| Directly from farmers                     | 45 (7.9%)                       | 32 (5.6%)                       | 0 (0%)                               | 22 (3.9%)       | 23 (4.0%)                           |
| Directly from layers that I own           | 1 (0.2%)                        | 1 (0.2%)                        | 0 (0%)                               | 6 (1.1%)        | 2 (0.4%)                            |
| Directly from broiler chickens that I own | 8 (1.4%)                        | 2 (0.4%)                        | 0 (0%)                               | 1 (0.2%)        | 14 (2.5%)                           |
